# Supplementary material for: The Improving Effect and Safety of Probiotic Supplements on Patients with Osteoporosis and Osteopenia: A Systematic Review and Meta-Analysis of 10 Randomized Controlled Trials
Source: Evid Based Complement Alternat Med. 2021 Jul 24;2021:9924410. doi: 10.1155/2021/9924410 (PMC8328694; doi:10.1155/2021/9924410)
Supplement: Supplementary Materials — PRISMA 2009 checklist: checklist; Table S1: search Strategies for PubMed and Embase. [file 9924410.f1.zip]

Archive with 2 entries (2 files):
- 9924410.f1/PRISMA 2009 checklist.pdf
- 9924410.f1/Table S1. Search Strategies for Pubmed and Embase.pdf
